# Supplementary material for: Unique Cyclized Thiolopyrrolones from the Marine-Derived Streptomyces sp. BTBU20218885
Source: MDPI journal article supplement (doi:10.3390/md20030214), 2022-03-18
Supplement: s1 [file s1]

## SUPPLEMENTARY MATERIAL

### Unique Cyclized Thiolopyrrolones from the Marine-Derived *Streptomyces* sp. BTBU20218885

Fuhang Song<sup>1,†</sup>, Jiansen Hu<sup>2,†</sup>, Xinwan Zhang<sup>3</sup>, Wei Xu<sup>3</sup>, Jinpeng Yang<sup>3</sup>, Shaoyong Li<sup>4</sup> and Xiuli Xu<sup>3,\*</sup>

<sup>1</sup> School of Light Industry, Beijing Technology and Business University, Beijing, 100048, P. R. China; (songfuhang@btbu.edu.cn)

<sup>2</sup> Laboratory of RNA Biology, Institute of Biophysics, Chinese Academy of Science, Beijing, 100101, P. R. China(jiansenhu@ibp.ac.cn)

<sup>3</sup> School of Ocean Sciences, China University of Geosciences, Beijing, 100083, P. R. China; zhangxinwan@cugb.edu.cn (X.Z); xuwei1110@cugb.edu.cn (W.X.); yangjinpeng@cugb.edu.cn (J.Y)

<sup>4</sup> School of Pharmacy, Tianjin Medical University, 300070 Tianjin, P. R. China; (lishaoyong@tmu.edu.cn)

<sup>†</sup> These authors contributed equally to this work

<sup>\*</sup> Correspondence: xuxl@cugb.edu.cn

## Table of Contents

|                                                                                                 |    |
|-------------------------------------------------------------------------------------------------|----|
| <b>Figure S1.</b> HRESIMS spectrum for <b>1</b> .....                                           | 3  |
| <b>Figure S2.</b> $^1\text{H}$ NMR spectrum (500 MHz, $\text{DMSO-}d_6$ ) of <b>1</b> .....     | 3  |
| <b>Figure S3.</b> $^{13}\text{C}$ NMR spectrum (125 MHz, $\text{DMSO-}d_6$ ) of <b>1</b> .....  | 4  |
| <b>Figure S4.</b> HSQC spectrum (500 MHz, $\text{DMSO-}d_6$ ) of <b>1</b> .....                 | 4  |
| <b>Figure S5.</b> HMBC spectrum (500 MHz, $\text{DMSO-}d_6$ ) of <b>1</b> .....                 | 5  |
| <b>Figure S6.</b> Expanded HMBC spectrum (500 MHz, $\text{DMSO-}d_6$ ) of <b>1</b> .....        | 5  |
| <b>Figure S7.</b> HRESIMS spectrum for <b>2</b> .....                                           | 6  |
| <b>Figure S8.</b> $^1\text{H}$ NMR spectrum (500 MHz, $\text{DMSO-}d_6$ ) of <b>2</b> .....     | 6  |
| <b>Figure S9.</b> $^{13}\text{C}$ NMR spectrum (125 MHz, $\text{DMSO-}d_6$ ) of <b>2</b> .....  | 7  |
| <b>Figure S10.</b> HSQC spectrum (500 MHz, $\text{DMSO-}d_6$ ) of <b>2</b> .....                | 7  |
| <b>Figure S11.</b> HMBC spectrum (500MHz, $\text{DMSO-}d_6$ ) of <b>2</b> .....                 | 8  |
| <b>Figure S12.</b> HRESIMS spectrum for <b>3</b> .....                                          | 8  |
| <b>Figure S13.</b> $^1\text{H}$ NMR spectrum (500 MHz, $\text{DMSO-}d_6$ ) of <b>3</b> .....    | 9  |
| <b>Figure S14.</b> $^{13}\text{C}$ NMR spectrum (125 MHz, $\text{DMSO-}d_6$ ) of <b>3</b> ..... | 9  |
| <b>Figure S15.</b> HSQC spectrum (500MHz, $\text{DMSO-}d_6$ ) of <b>3</b> .....                 | 10 |
| <b>Figure S16.</b> HMBC spectrum (500MHz, $\text{DMSO-}d_6$ ) of <b>3</b> .....                 | 10 |
| <b>Figure S17.</b> Colony characteristics of BTBU20218885 .....                                 | 11 |
| <b>Figure S18.</b> Neighbor-joining phylogenetic tree of BTBU20218885 .....                     | 11 |

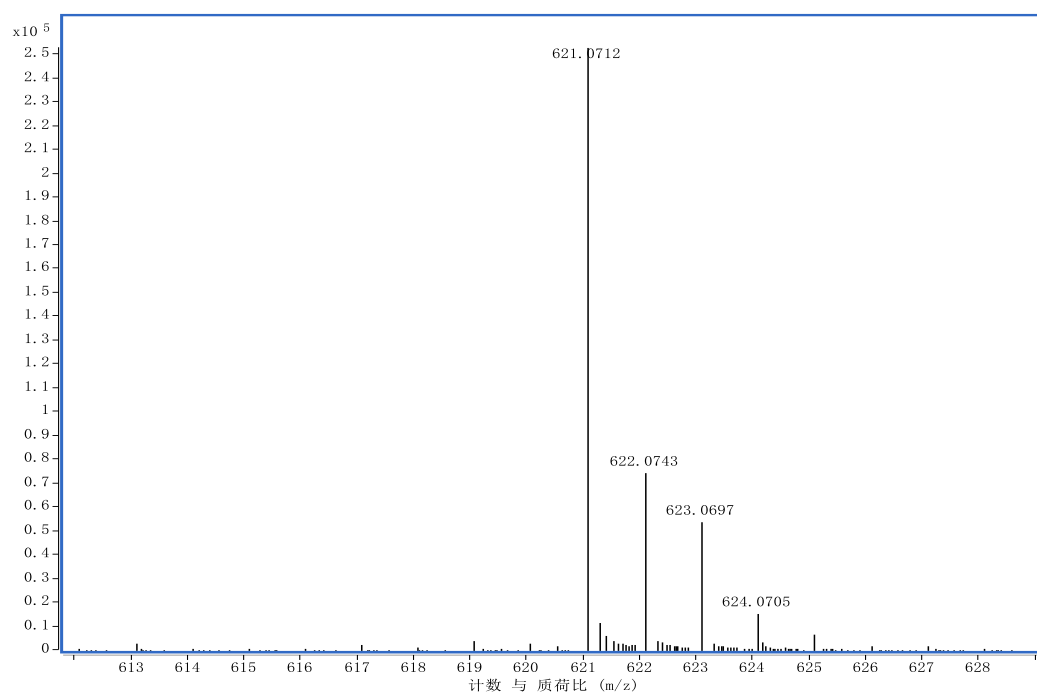

**Figure S1.** HRESIMS spectrum for compound **1**

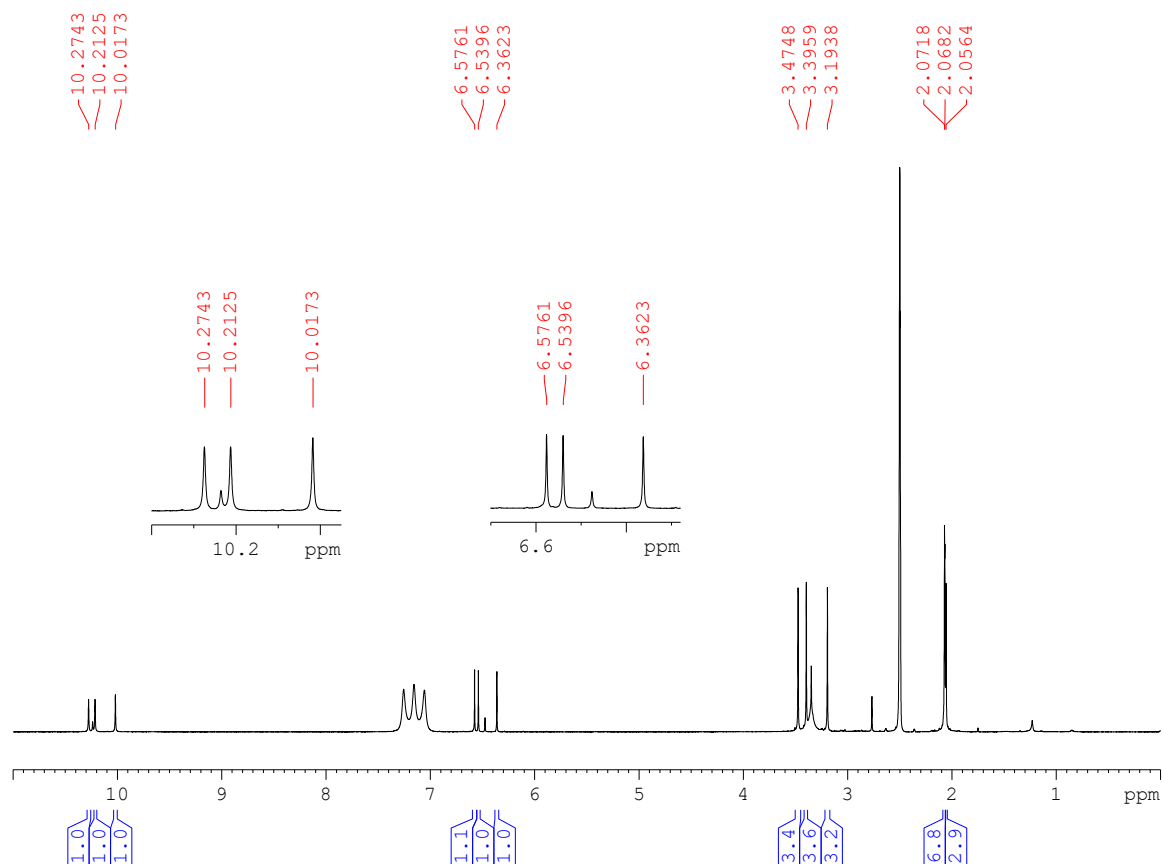

**Figure S2.** <sup>1</sup>H NMR spectrum (500 MHz, DMSO-*d*<sub>6</sub>) of **1**

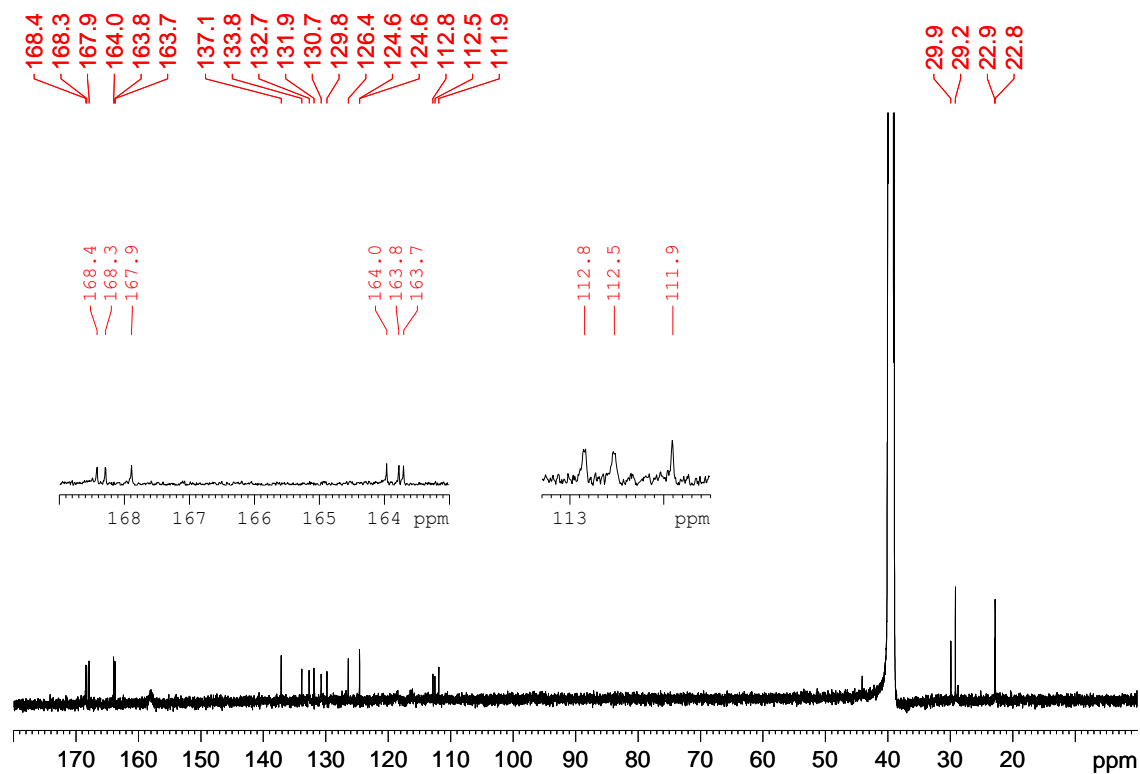

Figure S3. <sup>13</sup>C NMR spectrum (125 MHz, DMSO-*d*<sub>6</sub>) of **1**

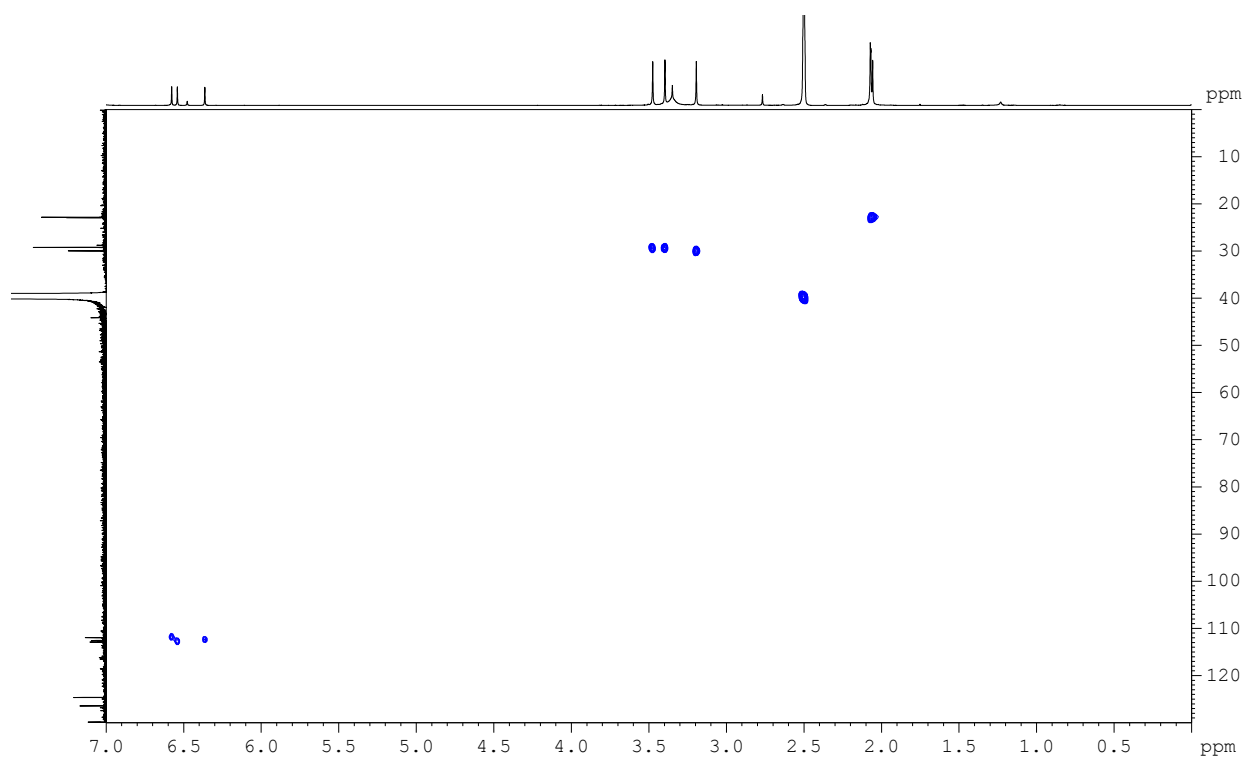

Figure S4. HSQC spectrum (500 MHz, DMSO-*d*<sub>6</sub>) of **1**

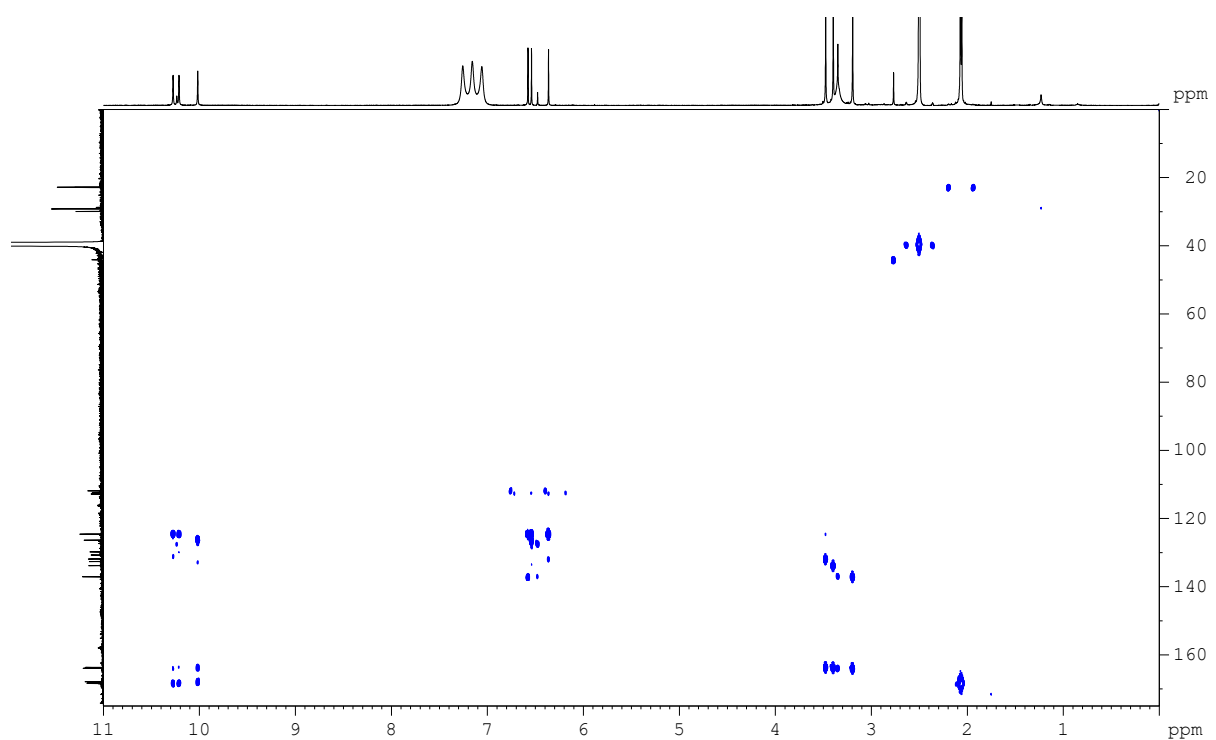

**Figure S5.** HMBC spectrum (500 MHz, DMSO- $d_6$ ) of **1**

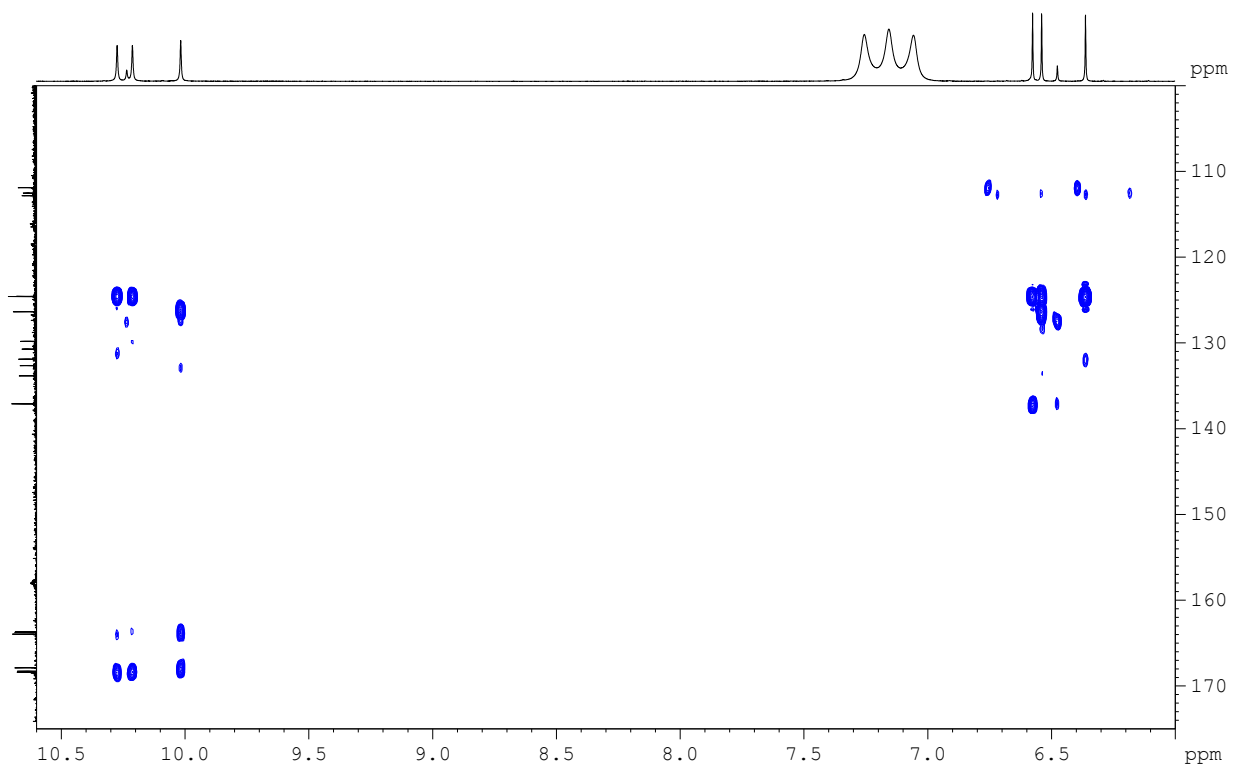

**Figure S6.** Expanded HMBC spectrum (500 MHz, DMSO- $d_6$ ) of **1**

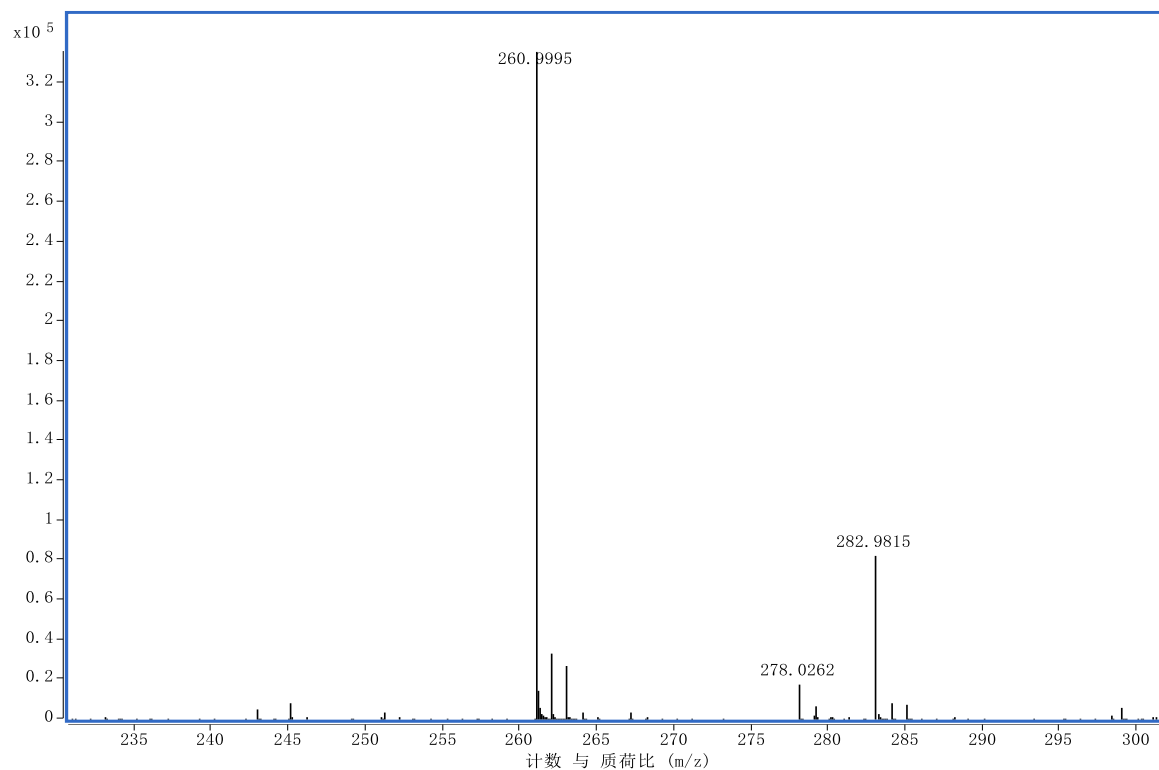**Figure S7.** HRESIMS spectrum for **2**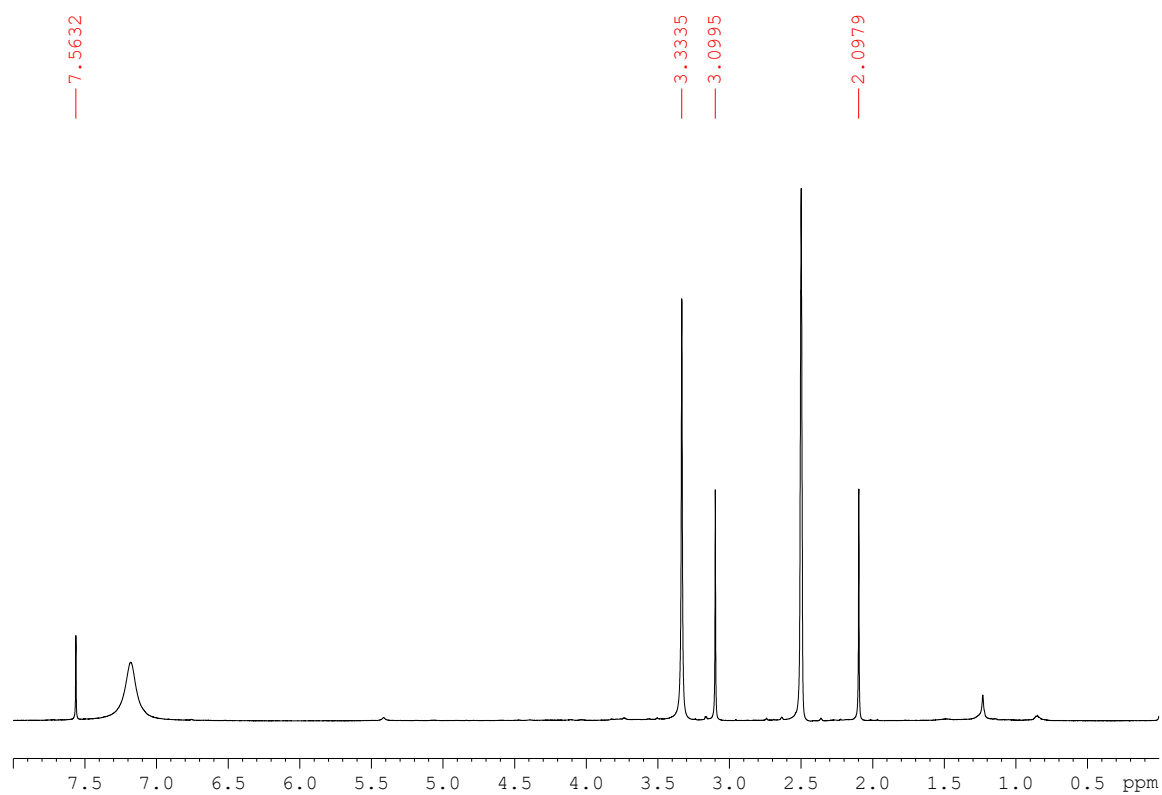**Figure S8.**  $^1\text{H}$  NMR spectrum (500 MHz,  $\text{DMSO}-d_6$ ) of **2**

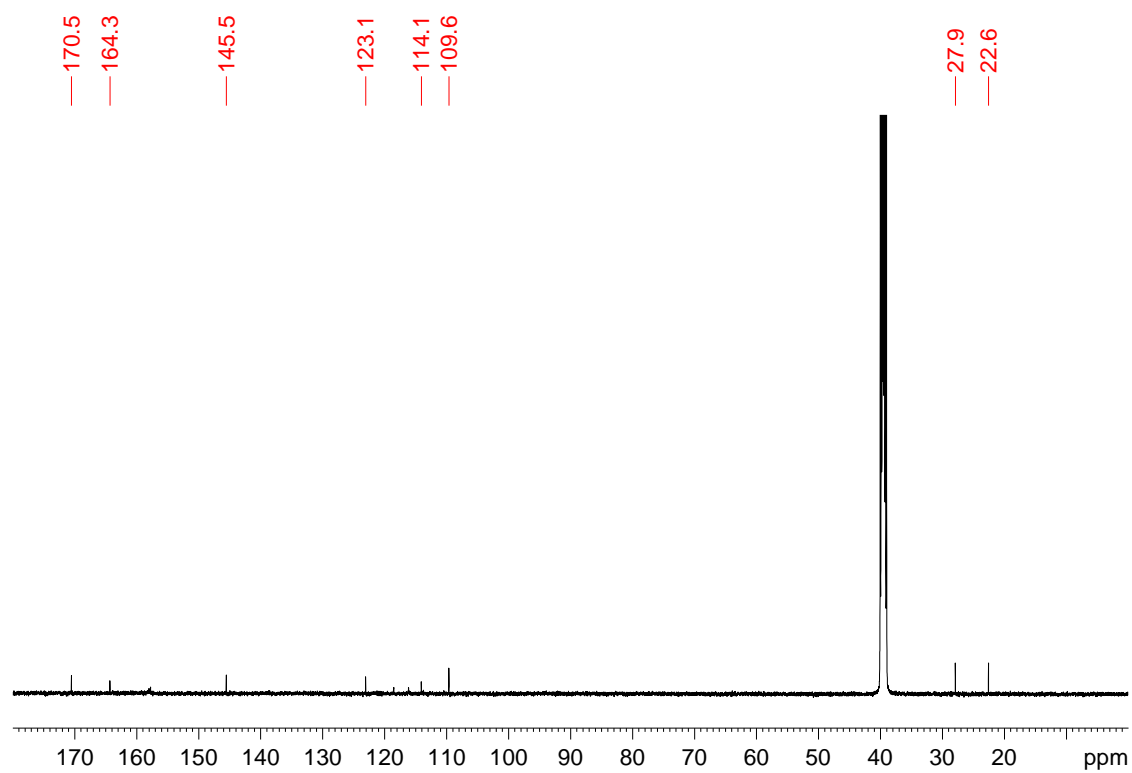

**Figure S9.**  $^{13}\text{C}$  NMR spectrum (125 MHz,  $\text{DMSO-}d_6$ ) of **2**

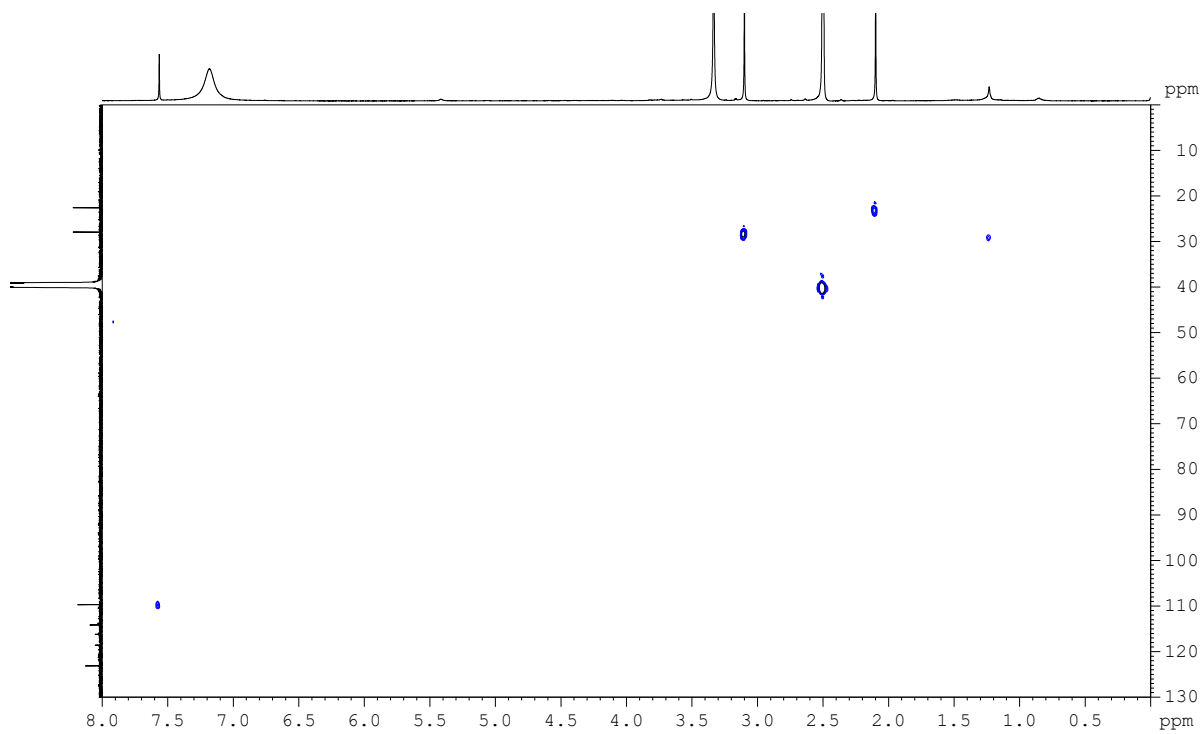

**Figure S10.** HSQC spectrum (500 MHz,  $\text{DMSO-}d_6$ ) of **2**

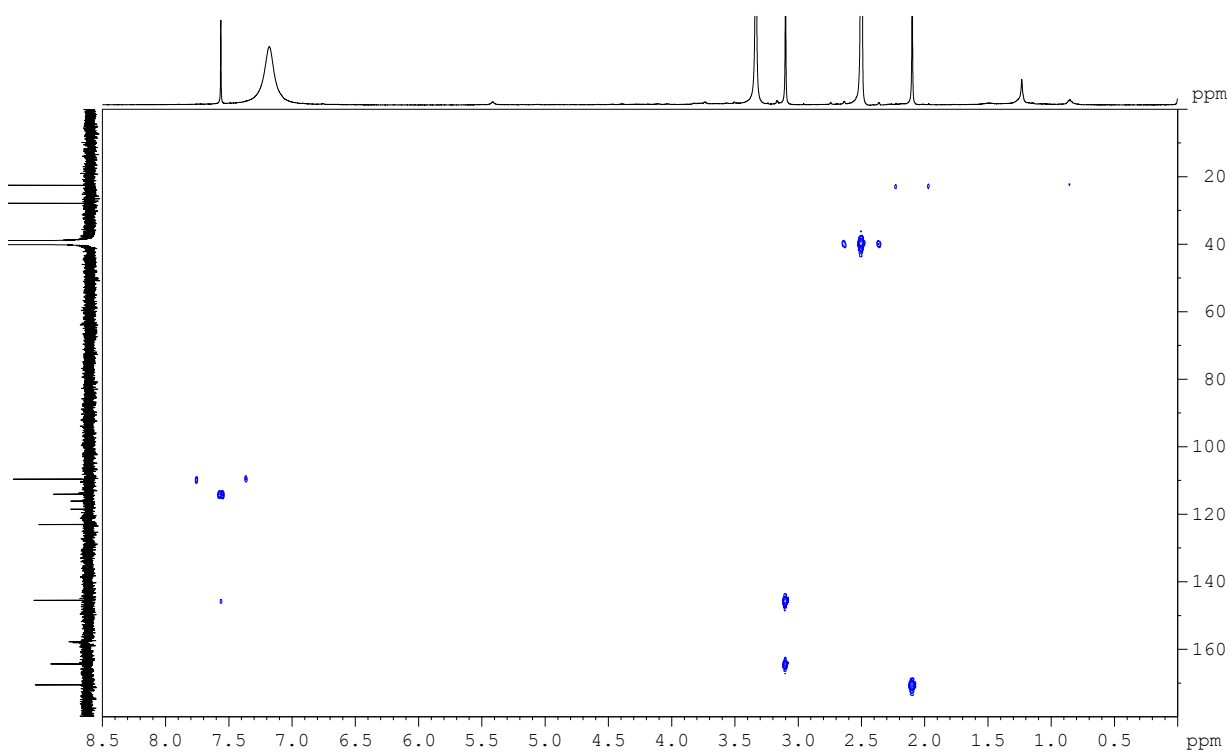

**Figure S11.** HMBC spectrum (500 MHz, DMSO- $d_6$ ) of **2**

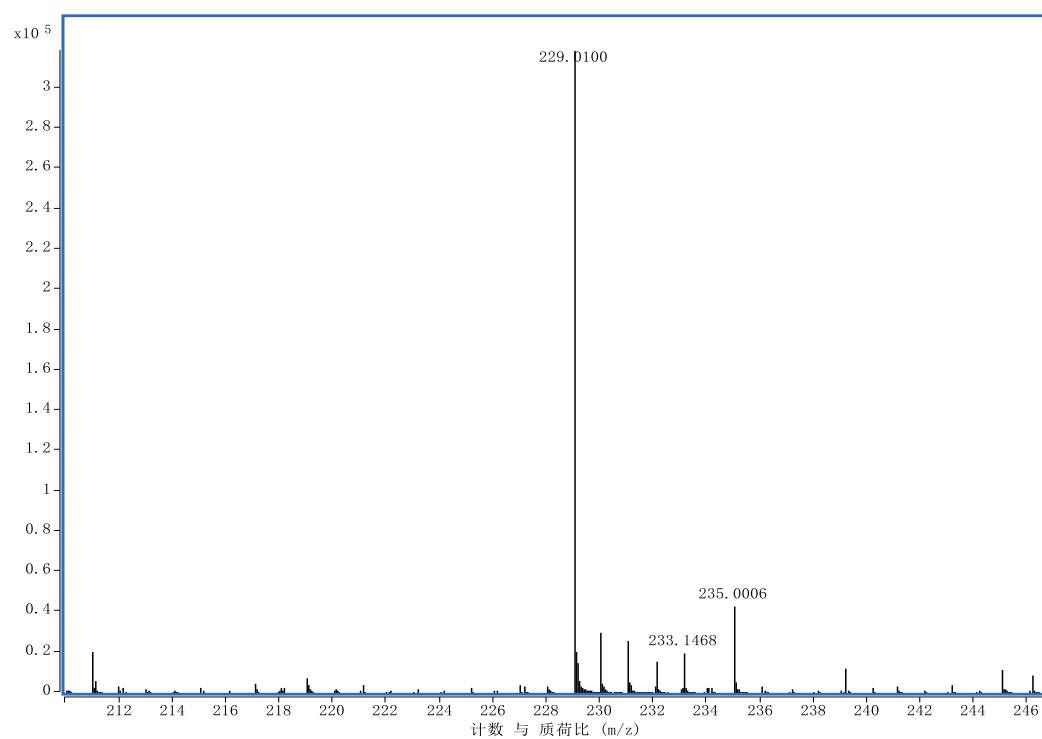

**Figure S12.** HRESIMS spectrum for **3**



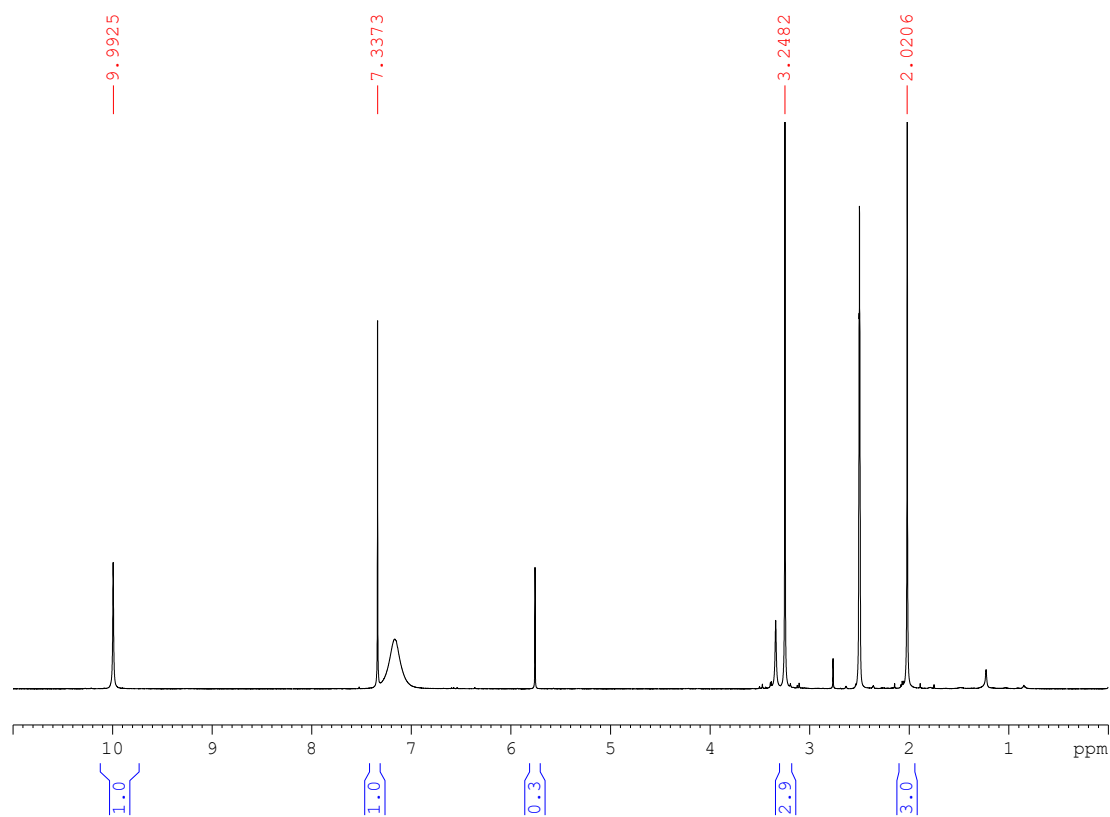

**Figure S13.** <sup>1</sup>H NMR spectrum (500 MHz, DMSO-*d*<sub>6</sub>) of **3**

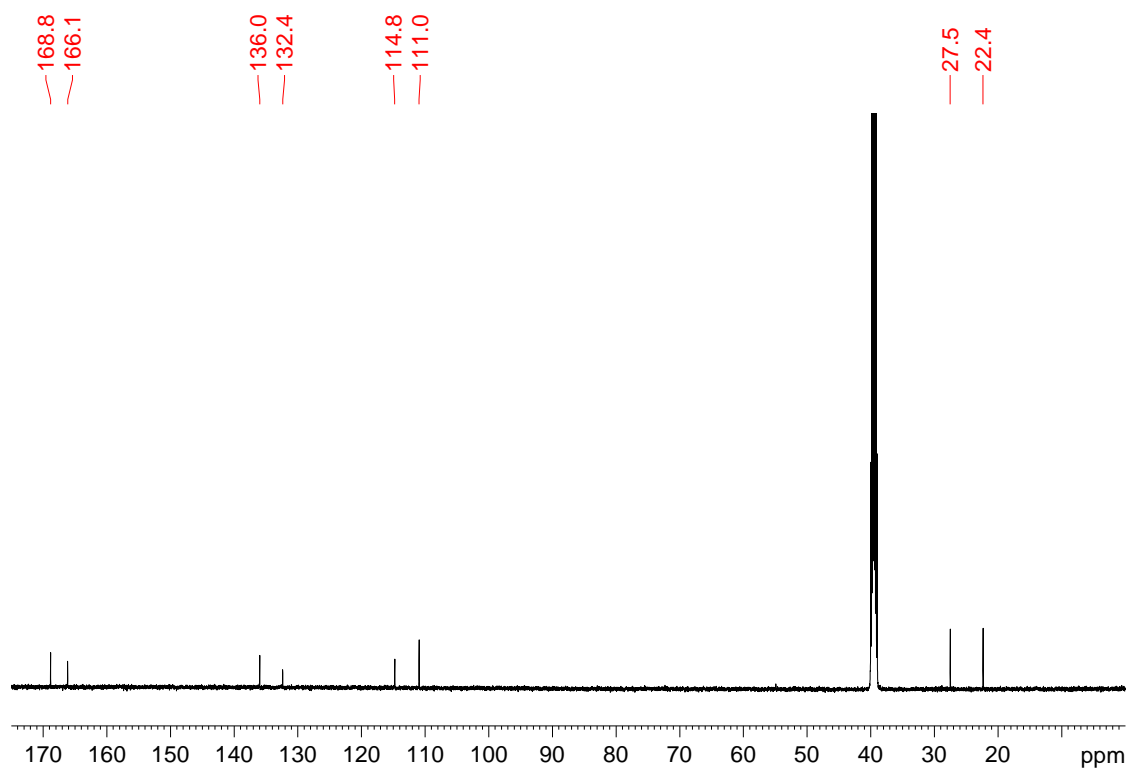

**Figure S14.** <sup>13</sup>C NMR spectrum (125 MHz, DMSO-*d*<sub>6</sub>) of **4**

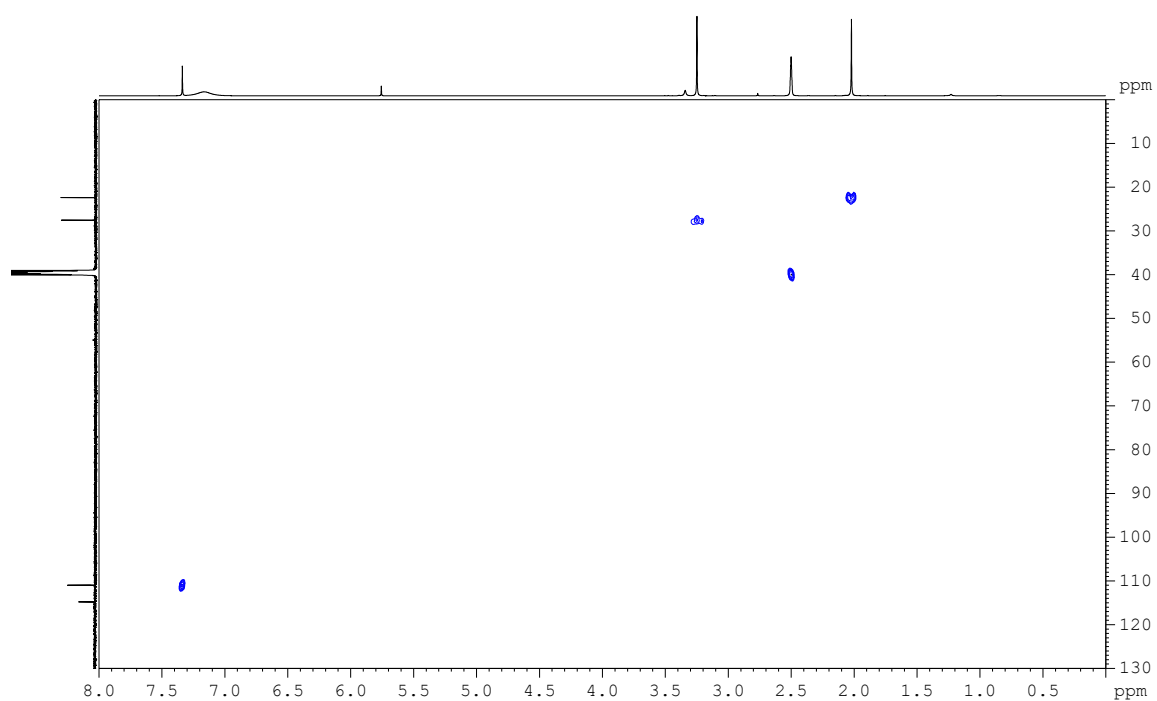

**Figure S15.** HSQC spectrum (500 MHz, DMSO-*d*<sub>6</sub>) of **4**

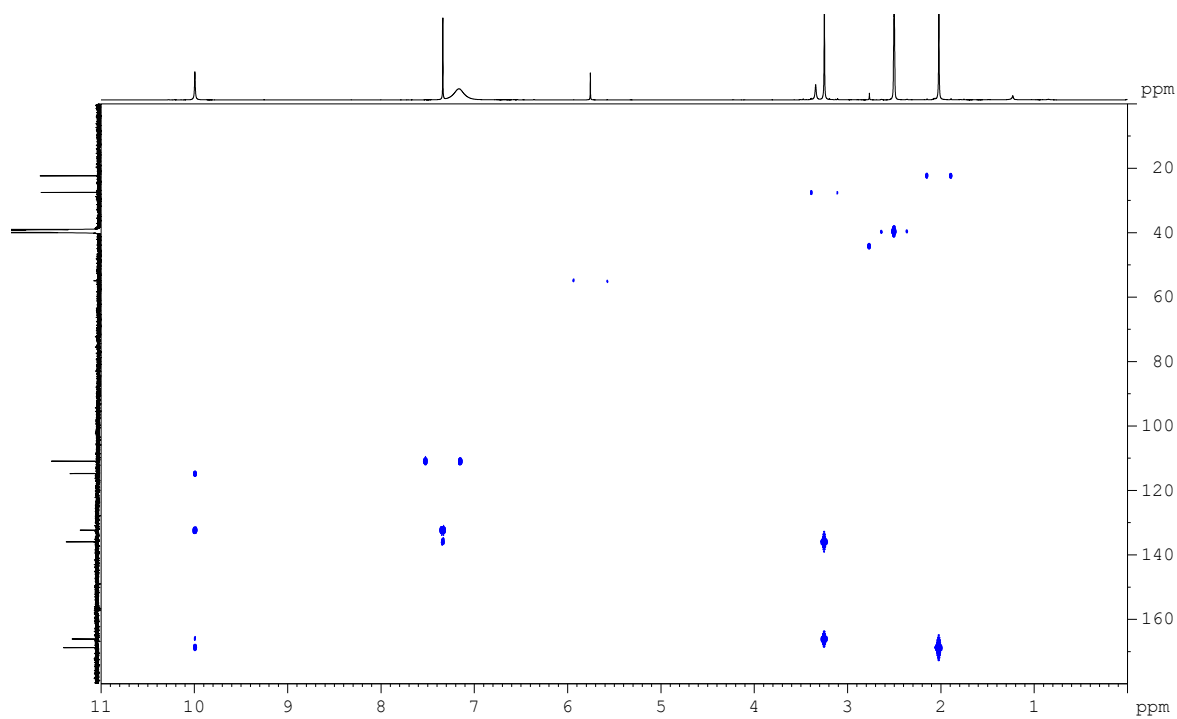

**Figure S16.** HMBC spectrum (500 MHz, DMSO-*d*<sub>6</sub>) of **3**

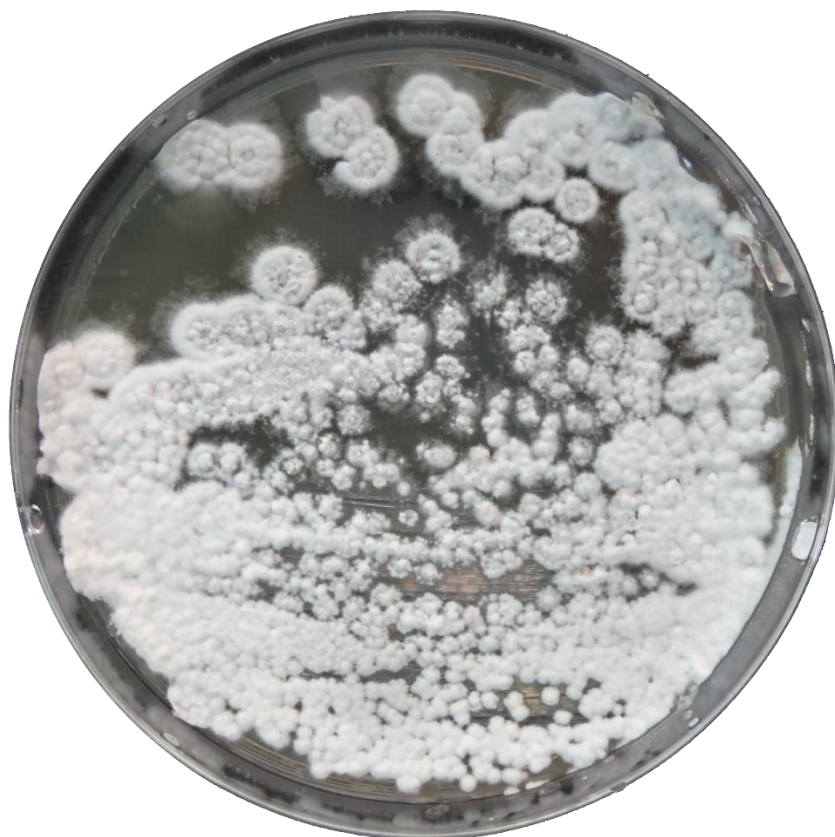

**Figure S17.** Colony characteristics of BTBU20218885

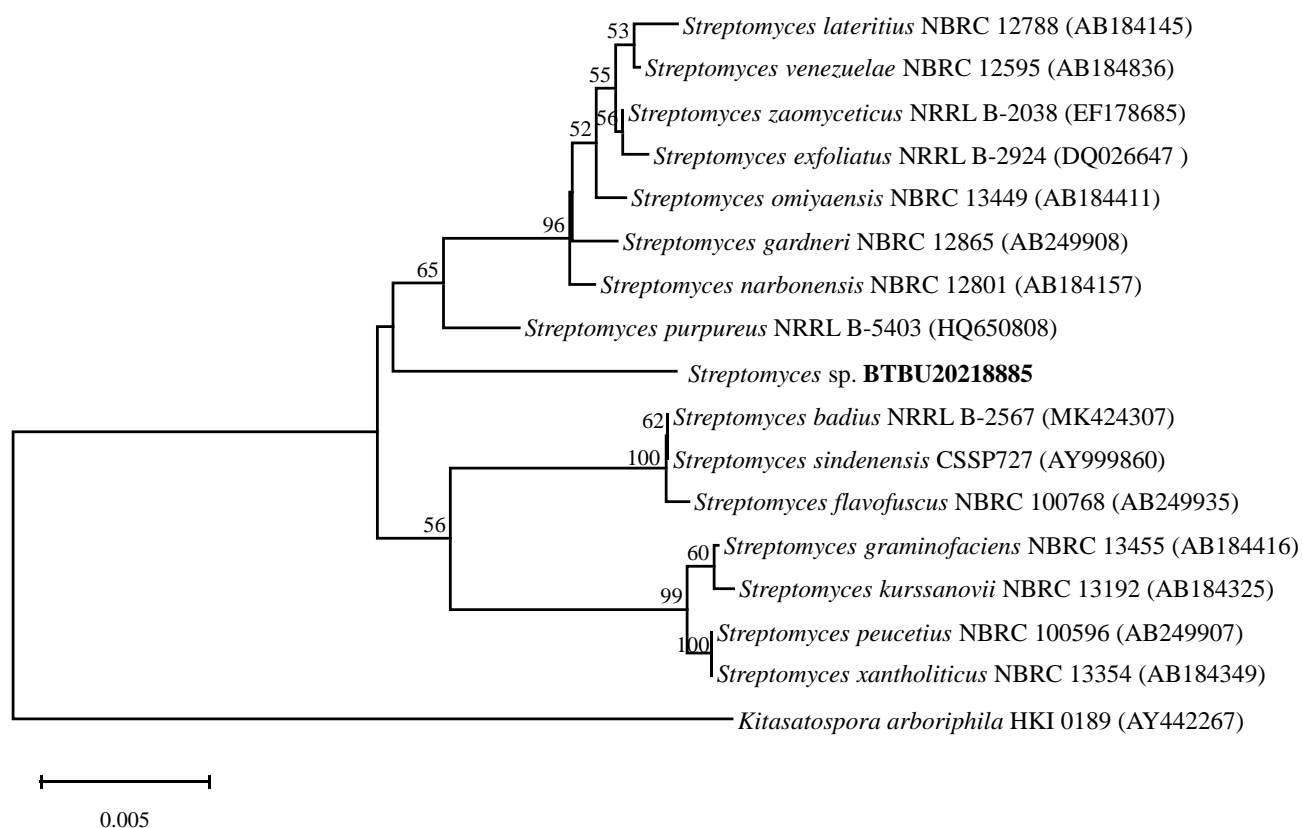

**Figure S18.** Neighbor-joining phylogenetic tree for *Streptomyces* sp. strain BTBU20218885
